# Supplementary material
Source: Springer Nature journal article supplement (https://www.springermedizin.de/resource/supplementary/12937_2008_183_MOESM5_ESM.pdf/25654572)
Supplement: MOESM5 [file 25654572]

Change in PGD2  
concentrations  
(pg/ml)

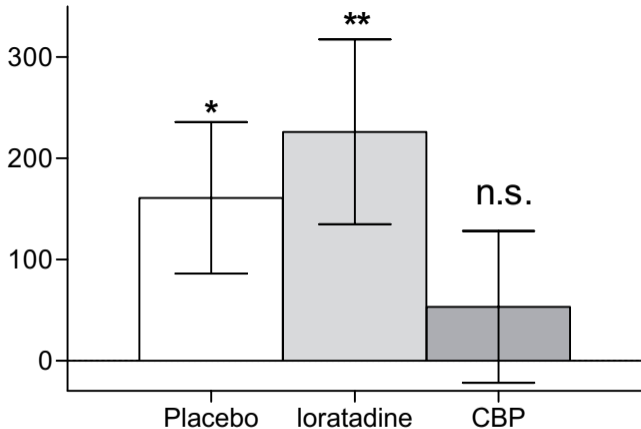

\*  $P = 0.04$ , \*\*  $P = 0.006$ , n.s., not significant,  
one-sample t-tests vs theoretical mean of zero
